# Supplementary material for: Association of Batai Virus Infection and Encephalitis in Harbor Seals, Germany, 2016
Source: Emerg Infect Dis. 2018 Sep;24(9):1691–5. doi: 10.3201/eid2409.171829 (PMC6106443; doi:10.3201/eid2409.171829)
Supplement: Technical Appendix — Additional information on Batai virus infection and encephalitis in harbor seals, Germany, 2016. [file 17-1829-Techapp-s1.pdf]

# Association of Batai Virus Infection and Encephalitis in Harbor Seals, Germany, 2016

## Technical Appendix

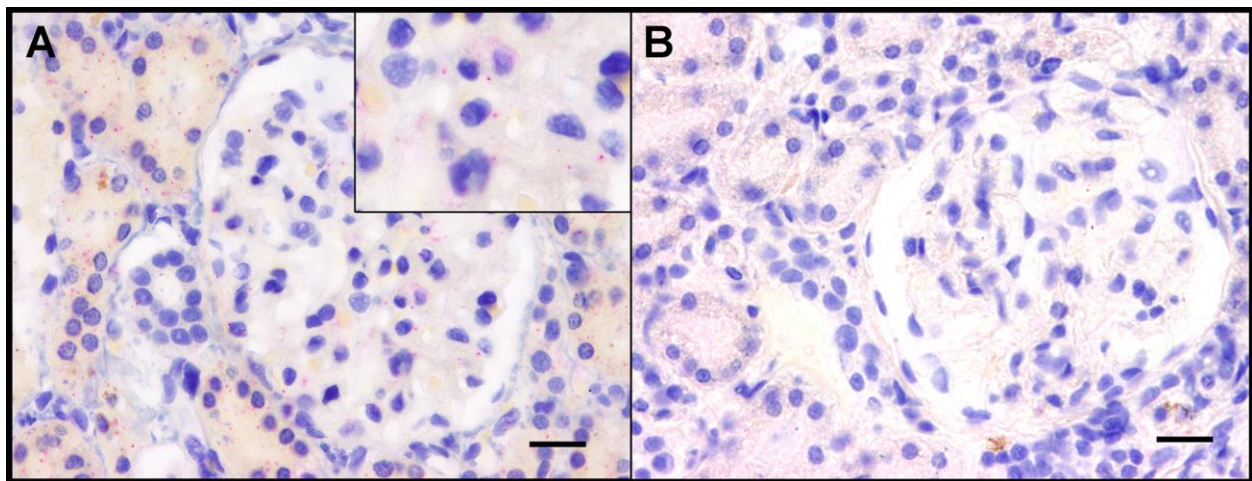

**Technical Appendix Figure.** Fluorescent in situ hybridization (FISH) of kidney cells from harbor seal infected with Batai virus, Germany, 2016. A) Cells within glomeruli and tubular epithelial cells showing a mild pink, intracytoplasmic BATV-specific result detected by FISH. Inset: Higher magnification view (fast red stain). B) Kidney tissue used as negative control (incubation without probe). Scale bars indicate 20  $\mu\text{m}$ .
